# Supplementary material for: An Inducible System for Silencing Establishment Reveals a Stepwise Mechanism in Which Anchoring at the Nuclear Periphery Precedes Heterochromatin Formation
Source: MDPI journal article supplement (doi:10.3390/cells10112810), 2021-10-20
Supplement: s1 [file s1]

# An Inducible System for Silencing Establishment Reveals a Stepwise Mechanism in Which Anchoring at the Nuclear Periphery Precedes Heterochromatin Formation

Isabelle Loïodice <sup>1</sup>, Mickael Garnier <sup>1</sup>, Ivaylo Nikolov <sup>1</sup> and Angela Taddei <sup>1,2,\*</sup>

<sup>1</sup> Nuclear Dynamics unit, CNRS, Institut Curie, PSL University, Sorbonne Université, 75005 Paris, France; isabelle.loiodice@curie.fr (I.L.); mickael.garnier@curie.fr (M.G.); ivaylo.l.nikolov@gmail.com (I.N.)

<sup>2</sup> Cogitamus Laboratory, F-75005 Paris, France

\* Correspondence: angela.taddei@curie.fr

**Table S1:** Yeast strains used in this study

| Name                                                                                           | Parent  | Genotype                                                                                                                  | Source     |
|------------------------------------------------------------------------------------------------|---------|---------------------------------------------------------------------------------------------------------------------------|------------|
| <b>W303-1 derived strains: <i>MATa ade2-1 can1-100 leu2-3,112 his3-11,15 trp1-1 ura3-1</i></b> |         |                                                                                                                           |            |
| yAT1                                                                                           |         | <i>MATa ade2-1 trp1-1 his3-11 his3-15 ura3-1 leu2-3 leu2-112 can1-100 rad5-</i>                                           | (1)        |
| yAT126                                                                                         | yAT1    | <i>MATa ade2-1::ADE2</i>                                                                                                  | (2)        |
| yAT2000                                                                                        | yAT2001 | <i>MATa lys2::EAD2I-lacO+(TRP1) nup49::mCherry-NUP49(URA3) his3::Hisp-GFP-LacI(HIS3)</i>                                  | This study |
| yAT2001                                                                                        |         | <i>MATa lys2::EAD2I-lacO+(TRP1) nup49::mCherry-NUP49(URA3)</i>                                                            | This study |
| yAT2059                                                                                        | yAT2001 | <i>MATa lys2::EAD2I-lacO+(TRP1) nup49::mCherry-NUP49(URA3) leu2::Hisp-GFP-LacIR(LEU2)</i>                                 | This study |
| yAT2078                                                                                        | yAT2059 | <i>MATa lys2::EAD2I-lacO+(TRP1) nup49::mCherry-NUP49(URA3) leu2::pGalS(NAT)-GFP-LacIR(LEU2)</i>                           | This study |
| yAT2156                                                                                        | yAT2000 | <i>MATa lys2::EAD2I-lacO+(TRP1) nup49::mCherry-NUP49(URA3) his3::Hisp-GFP-LacI(HIS3) sir3Δ::KanMX4 hmlΔ::ClonNath</i>     | This study |
| yAT2370                                                                                        | yAT2078 | <i>MATa lys2::EAD2I-lacO+(TRP1) nup49::mCherry-NUP49(URA3) leu2::pGalS(NAT)-GFP-LacIR(LEU2) hmlΔ::KanMX sir3Δ::HPH</i>    | This study |
| yAT3259                                                                                        | yAT2078 | <i>MATa lys2::EAD2I-lacO+(TRP1) nup49::mCherry-NUP49(URA3) leu2::pGalS(NAT)-GFP-LacIR(LEU2) sir4Δ::HPH HMLΔ::KanMX</i>    | This study |
| yAT3258                                                                                        | yAT2078 | <i>MATa lys2::EAD2I-lacO+(TRP1); nup49::mCherry-NUP49(URA3); leu2::pGalS(NAT)-GFP-LacIR(LEU2) hmlΔ::HPH sir1Δ::KanMX</i>  | This study |
| yAT3420                                                                                        |         | <i>MATa lys2:: lacO+(TRP1) Nup49::mCherry-NUP49(URA3) leu2::Hisp-GFP-LacIR(LEU2)</i>                                      | This study |
| yAT3471                                                                                        | yAT3420 | <i>MATa lys2:: lacO+(TRP1) Nup49::mCherry-NUP49(URA3) leu2::pGalS(NAT)-GFP-LacIR(LEU2)</i>                                | This study |
| yAT2314                                                                                        | yAT2078 | <i>MATa lys2::EAD2I-lacO+(TRP1) nup49::mCherry-NUP49 (URA3) leu2::pGalS(NAT)-GFP-LacIR (LEU2) tel1Δ::KanMX</i>            | This study |
| yAT2904                                                                                        | yAT2078 | <i>MATa lys2::EAD2I-lacO+(TRP1) nup49::mCherry-NUP49(URA3) leu2::pGalS-(NAT)-LacIR-GFP(LEU2) mec1Δ::His5 sml1Δ::KanMX</i> | This study |

|                                                                                |         |                                                                                                                                                |            |
|--------------------------------------------------------------------------------|---------|------------------------------------------------------------------------------------------------------------------------------------------------|------------|
| Y01177                                                                         |         | <i>MATa trp1-1 ura3-1 his3-11,15 leu2-3,112 ade2-1 can1-100 hta1 S129A hta2 S129A</i>                                                          | (3)        |
| yAT2965                                                                        | Y01177  | <i>MATa lys2::EADE2I-lacO+(TRP1) nup49::mCherry-NUP49(URA3) leu2::pGalS-(NAT)-LacIR-GFP(LEU2) hta1-S129A hta2-S129A</i>                        | This study |
| yAT2995                                                                        | yAT2965 | <i>MATa lys2::EADE2I-lacO+(TRP1) nup49::mCherry-NUP49(URA3) leu2::pGalS-(NAT)-LacIR-GFP(LEU2) sir3Δ::KanMX hmlΔ::HPH hta1-S129A hta2-S129A</i> | This study |
| <b>S288C derived strains: <i>MATa ura3-52 leu2Δ1 trp1Δ63 his3Δ200 GAL2</i></b> |         |                                                                                                                                                |            |
| yAT1372                                                                        | FY1679  | <i>MATa/MATα ura3-52/ura3-52; trp1Δ 63/TRP1; leu2Δ 1/LEU2; his3Δ 200/HIS3; GAL2/GAL2</i>                                                       | (4)        |
| yAT1743                                                                        | yAT1372 | <i>MATa; ura3-52; leu2Δ 1; trp1Δ 63; his3Δ 200; GAL2</i>                                                                                       | This study |
| yAT1798                                                                        | yAT1743 | <i>MATa ade2::His3p-LacI-GFP (LEU2) lys2::LacO+(TRP1)</i>                                                                                      | This study |
| yAT1909                                                                        | yAT1743 | <i>MATa ade2::pGalS(NAT)-GFP-LacIR(LEU2) lys2::LacO+ (TRP)</i>                                                                                 | This study |
| yAT2142                                                                        | yAT1909 | <i>MATa ade2::pGalS(NAT)-GFP-LacIR(LEU2) lys2::LacO+ (TRP) mre11<sup>+</sup> ::KanMX</i>                                                       | This study |

lacO+: lacO repeats provided by David Sherratt (Lau et al. 2003); lacO array of 120 repeats integrated using pAT229 described in (Dubarry et al, 2011).

(1) Thomas and Rothstein. *Cell*. 1989 Feb24;56(4):619-30. doi: 10.1016/0092-8674(89)90584-9

(2) Ruault et al. *J Cell Biol*. 2011 Feb 7;192(3):417-31. doi: 10.1083/jcb.201008007.

(3) Masumoto et al. *Nature*. 2005 Jul14;436(7048):294-8. doi: 10.1038/nature03714

(4) Winston et al. *Yeast* Jan 11(1):53-5. doi: 10.1002/yea.320110107.

**Table S2:** Primers used in this study

| qPCR primers    |                   | Forward primer 5'-3'       | Reverse primer 5'-3'        |
|-----------------|-------------------|----------------------------|-----------------------------|
| oAT588/oAT589   | <i>ACT1</i>       | GGTGGTCTATCTTGGCTTC        | ATGGACCACTTTCGTCGTAT        |
| oAT643/oAT644   | <i>OGG1</i>       | CAATGGTGTAGGCCCCAAAG       | ACGATGCCATCCATGTGAAGT       |
| oAT543/oAT544   | lacO+ (P1)*       | ACCCCGCCTCGTTTGC           | GGATCAATTTGAAGAGTAGCTCTAGCA |
| oAT950/oAT951   | lacO+ (P2)*       | CCCTTCCTGCTAGAGTTACTTCTTCA | AGCTCTAGCATGGAGAAACGAATT    |
| oAT641/oAT642   | <i>LYS2</i> (P3)  | TCGCAAAAATGCCGACAAT        | GCTTGTCAAATCTTGGGACCAT      |
| oAT1540/oAT1541 | <i>LYS2</i> (P4)  | TGATTTACCATTGGGCACAATT     | AATTTCCGCGGCAAAGG           |
| oAT158/oAT159   | <i>ADE2</i> (P5)# | CGTATGATTGTTGAGGCAGCA      | GGCAGGAGAATTTTCAGCATCT      |
| oAT1562/oAT1563 | <i>LYS2</i> (P6)  | CGTCAGGGCCAAGGATGA         | AGTACCATAGGTGATACCTGCTTTT   |
| oAT615/oAT616   | Tel6R 0,2kb       | TGAGGCCATTTCCGTGTGTA       | CCCAGTCCTCATTTCATCAA        |
| oAT637/oAT638   | Tel6R 0,5kb       | GGCTGGACTACTTTCTGGAATAGC   | GAAGTGTGCATCCACTCGTTAGG     |
| oAT617/oAT618   | Tel6R 1kb         | TGATGAATTACAAGGGAACAATGAG  | CATCAAACAAGTAGGAATGCGAAA    |
| oAT619/oAT620   | Tel6R 2,4kb       | TCTCCTTGTCGTCATGTGAAAGTC   | AGAGGAGAGTTGCTGCTTCATCA     |

# *ADE2* primers were designed to avoid detection of the endogenous *ade2-1* alleles (Taddei et al. 2006).  
 \* These primers amplify one specific region of the *lacO* array found in the pAT229 plasmid.

### Cloning primers

#### To integrate GFP-LacI at ADE2

##### pAT378 :

|        |                   |                                |
|--------|-------------------|--------------------------------|
| oAT884 | <b>SacI site</b>  | GAGAGAGCTCCGTTAATGGCTCCTTTTCCA |
| oAT885 | <b>SacII site</b> | GAGACCGCGGATGGCGTTCGTTGTAATGGT |
| oAT995 | <b>NaeI site</b>  | GAGAGCCGGCAGATTTTGGCGTTCCATTG  |
| oAT996 | <b>SacI site</b>  | GAGAGAGCTCAAGAAAGCTCCCCAACCCTA |

#### Site directed mutagenesis on pAT378 to generate a LacI resistant to

##### galactose

|         |                                                        |
|---------|--------------------------------------------------------|
| oAT1221 | ATTAAGTTCTGTCTCGGCGCGTCTGAAGCTGGCTGGCTGGCATA<br>AATATC |
| oAT1222 | GATATTTATGCCAGCCAGCCAGCTTCAGACGCGCCGAGACAG<br>AACTTAAT |

#### Site directed mutagenesis on pAT123 to generate a LacI resistant to

##### galactose

|         |                                       |
|---------|---------------------------------------|
| oAT1168 | CTGTCTCGGCGCGTCTTAAGCTGGCTGGCTGGCATAA |
| oAT1169 | TTATGCCAGCCAGCCAGCTTAAGACGCGCCGAGACAG |

**Table S3:** Number of experiments for each figure

| Figure 2D | RT-QPCR: <i>ADE2</i> mRNA   | Number of experiments |     |     |     |      |   |
|-----------|-----------------------------|-----------------------|-----|-----|-----|------|---|
|           | Time after induction in min | 0                     | 180 | 270 | 360 | 1200 |   |
| yAT2059   | wt const.                   | 3                     |     |     |     |      | 3 |
| yAT2078   | wt ind.                     | 5                     | 4   | 4   | 3   | 3    | 5 |

#### Figure 3A ChIP-QPCR Sir3 Number of experiments for each primer

|         | Primer                                | P1   | P2   | P3 | P4   | P5  |
|---------|---------------------------------------|------|------|----|------|-----|
|         | Distance from <i>E</i> silencer in kb | -3,7 | -2,2 | -1 | -0,5 | 3,2 |
| yAT2059 | wt const.                             | 6    | 8    | 7  | 8    | 7   |
| yAT2078 | wt non-ind.                           | 17   | 19   | 19 | 18   | 17  |
|         | wt ind. 45 min                        | 4    | 4    | 4  | 4    | 4   |
|         | wt ind. 90 min                        | 7    | 7    | 7  | 7    | 7   |
|         | wt ind. 180 min                       | 12   | 14   | 14 | 13   | 12  |
|         | wt ind. 270 min                       | 4    | 5    | 5  | 5    | 4   |
|         | wt ind. 1200 min                      | 10   | 13   | 12 | 12   | 11  |

#### Figure 3B ChIP-QPCR Sir3 Number of experiments for each primer

|         | time in min after induction | 0  | 45 | 90 | 180 | 270 |
|---------|-----------------------------|----|----|----|-----|-----|
| yAT2078 | wt ind. at P2               | 19 | 4  | 7  | 14  | 5   |
|         | wt ind. at P4               | 18 | 4  | 7  | 13  | 5   |
|         | wt ind. at P5               | 17 | 4  | 7  | 12  | 4   |

|            |                                       |                                       |      |    |      |      |
|------------|---------------------------------------|---------------------------------------|------|----|------|------|
| Figure 3C  | ChIP-QPCR H4K16                       | Number of experiments for each primer |      |    |      |      |
|            | time in min after induction           | 0                                     | 45   | 90 | 180  | 1200 |
|            | yAT2078 wt ind. at P4                 | 8                                     | 3    | 4  | 4    | 3    |
|            | wt Ind. at P5                         | 7                                     | 3    | 4  | 3    | 3    |
| Figure S3A | ChIP-QPCR Sir4                        | Number of experiments for each primer |      |    |      |      |
|            | Primer                                | P1                                    | P2   | P3 | P4   | P5   |
|            | Distance from <i>E</i> silencer in kb | -3,7                                  | -2,2 | -1 | -0,5 | 3,2  |
|            | yAT2078 wt non-ind.                   | 5                                     | 5    | 5  | 5    | 4    |
|            | wt ind. 180 min                       | 4                                     | 4    | 4  | 4    | 3    |
|            | wt ind. 1200 min                      | 3                                     | 4    | 3  | 4    | 3    |
| Figure S3B | ChIP-QPCR Sir3                        | Number of experiments for each primer |      |    |      |      |
|            | Primer                                | P1                                    | P2   | P3 | P4   | P5   |
|            | Distance from <i>E</i> silencer in kb | -3,7                                  | -2,2 | -1 | -0,5 | 3,2  |
|            | yAT2078 wt non-ind.                   | 4                                     | 4    | 4  | 4    | 4    |
|            | wt ind. 20 h                          | 4                                     | 4    | 4  | 4    | 4    |
|            | wt ind. 48 h                          | 4                                     | 4    | 4  | 4    | 4    |
|            | wt ind. 72 h                          | 4                                     | 4    | 4  | 4    | 4    |
| Figure S3C | ChIP-QPCR H4K16                       |                                       |      |    |      |      |
|            | Primer                                | P1                                    | P2   | P3 | P4   | P5   |
|            | Distance from <i>E</i> silencer in kb | -3,7                                  | -2,2 | -1 | -0,5 | 3,2  |
|            | yAT2078 wt non-ind.                   | 8                                     | 8    | 8  | 8    | 7    |
|            | wt ind. 45 min                        | 3                                     | 3    | 3  | 3    | 3    |
|            | wt ind. 90 min                        | 4                                     | 4    | 4  | 4    | 4    |
|            | wt ind. 180 min                       | 4                                     | 4    | 4  | 4    | 3    |
|            | wt ind. 1200 min                      | 3                                     | 3    | 3  | 3    | 3    |
| Figure S3D | ChIP-QPCR H4K16/H2A                   | Number of experiments for each primer |      |    |      |      |
|            | time in min after induction           | 0                                     | 45   | 90 | 180  | 1200 |
|            | yAT2078 wt ind. at P1                 | 8                                     | 3    | 4  | 4    | 3    |
|            | wt ind. at P2                         | 8                                     | 3    | 4  | 4    | 3    |
|            | wt ind. at P4                         | 8                                     | 3    | 4  | 4    | 3    |
|            | wt ind. at P5                         | 7                                     | 3    | 4  | 3    | 3    |
| Figure 5A  | ChIP-QPCR H2AP/H2A                    | Number of experiments for each primer |      |    |      |      |
|            | Primer                                | P1                                    | P2   | P3 | P4   | P5   |
|            | Distance from <i>E</i> silencer in kb | -3,7                                  | -2,2 | -1 | -0,5 | 3,2  |
|            | yAT2059 wt const.                     | 3                                     | 3    | 3  | 3    | 3    |
|            | yAT2078 wt ind. Raf                   | 9                                     | 11   | 10 | 12   | 13   |
|            | wt ind. 45 min                        | 3                                     | 4    | 3  | 5    | 5    |
|            | wt ind. 90 min                        | 6                                     | 8    | 7  | 8    | 9    |
|            | wt ind. 180 min                       | 6                                     | 6    | 7  | 7    | 7    |
|            | wt ind. 1200 min                      | 4                                     | 6    | 5  | 8    | 8    |

|           |                                                                               |                                       |    |     |      |
|-----------|-------------------------------------------------------------------------------|---------------------------------------|----|-----|------|
| Figure 5B | ChIP-QPCR H2AP/H2A                                                            | Number of experiments for each primer |    |     |      |
|           | Only experiments made the same day for the wt and the mutants are represented |                                       |    |     |      |
|           | time in min after induction                                                   | 0                                     | 90 | 180 | 1200 |
| yAT2078   | wt ind. at P4                                                                 | 6                                     | 3  | 4   | 3    |
| yAT2314   | $\Delta tel1$ ind. at P4                                                      | 6                                     | 3  | 4   | 3    |
| yAT2904   | $\Delta mec1$ ind. at P4                                                      | 5                                     | 3  | 3   | 3    |

|           |                             |                                       |    |    |     |      |
|-----------|-----------------------------|---------------------------------------|----|----|-----|------|
| Figure 5C | ChIP-QPCR H2AP/H2A          | Number of experiments for each primer |    |    |     |      |
|           | time in min after induction | 0                                     | 45 | 90 | 180 | 1200 |
| yAT2078   | wt ind at P4                | 12                                    | 5  | 8  | 7   | 8    |
| yAT2370   | $\Delta sir3$ ind. at P4    | 7                                     | 3  | 3  | 5   | 4    |

|           |                                                                              |                                       |      |  |  |
|-----------|------------------------------------------------------------------------------|---------------------------------------|------|--|--|
| Figure 5D | ChIP-QPCR Sir3                                                               | Number of experiments for each primer |      |  |  |
|           | Only experiments made the same day for the wt and the mutant are represented |                                       |      |  |  |
|           | Time in min after induction                                                  | 0                                     | 20 h |  |  |
| yAT2078   | wt ind. at P4                                                                | 3                                     | 3    |  |  |
| yAT2965   | <i>hta-S129A</i> ind. at P4                                                  | 3                                     | 3    |  |  |
| yAT2078   | wt ind. at P5                                                                | 3                                     | 3    |  |  |
| yAT2965   | <i>hta-S129A</i> ind. at P5                                                  | 3                                     | 3    |  |  |

|            |                                       |                                       |      |    |      |     |
|------------|---------------------------------------|---------------------------------------|------|----|------|-----|
| Figure S5A | ChIP-QPCR H2AP                        | Number of experiments for each primer |      |    |      |     |
|            | Primer                                | P1                                    | P2   | P3 | P4   | P5  |
|            | Distance from <i>E</i> silencer in kb | -3,7                                  | -2,2 | -1 | -0,5 | 3,2 |
| yAT2059    | wt const.                             | 3                                     | 3    | 3  | 3    | 3   |
| yAT2078    | wt non-ind.                           | 9                                     | 11   | 10 | 12   | 13  |
|            | wt ind. 45 min                        | 3                                     | 4    | 3  | 5    | 5   |
|            | wt ind. 90 min                        | 6                                     | 8    | 7  | 8    | 9   |
|            | wt ind. 180 min                       | 6                                     | 6    | 7  | 7    | 7   |
|            | wt ind. 1200 min                      | 4                                     | 6    | 6  | 7    | 8   |

|            |                             |                                       |    |    |     |      |
|------------|-----------------------------|---------------------------------------|----|----|-----|------|
| Figure S5B | ChIP-QPCR H2AP/H2A          | Number of experiments for each primer |    |    |     |      |
|            | time in min after induction | 0                                     | 45 | 90 | 180 | 1200 |
| yAT2059    | wt const.at P2              | 3                                     | 3  | 3  | 3   | 3    |
|            | wt const.at P4              | 3                                     | 3  | 3  | 3   | 3    |
| yAT2078    | wt ind at P2                | 11                                    | 4  | 8  | 6   | 6    |
|            | wt ind at P4                | 12                                    | 5  | 8  | 7   | 8    |

|            |                         |                                       |        |      |        |
|------------|-------------------------|---------------------------------------|--------|------|--------|
| Figure S5C | ChIP-QPCR H2AP/H2A      | Number of experiments for each primer |        |      |        |
|            | Distance from End Tel6R | 0,2 kb                                | 0,5 kb | 1 kb | 2,4 kb |
| yAT2078    | wt                      | 16                                    | 5      | 5    | 3      |
| yAT2314    | $\Delta tel1$           | 11                                    | 4      | 4    | 4      |
| yAT2904    | $\Delta mec1$           | 6                                     | 3      | 3    | 3      |
| yAT2370    | $\Delta sir3$           | 10                                    | 4      | 4    | nd     |

|                                 |                                       |                                       |        |    |      |      |
|---------------------------------|---------------------------------------|---------------------------------------|--------|----|------|------|
| Figure S5E                      | ChIP-QPCR H2AP/H2A                    | Number of experiments for each primer |        |    |      |      |
|                                 | time in min after induction           | 0                                     | 45     | 90 | 180  | 1200 |
|                                 | yAT2059 wt ind at P2                  | 11                                    | 4      | 8  | 6    | 6    |
|                                 | wt ind at P5                          | 13                                    | 5      | 9  | 7    | 8    |
|                                 | yAT2370 $\Delta sir3$ ind at P2       | 7                                     | 3      | 3  | 5    | 4    |
|                                 | $\Delta sir3$ ind at P5               | 6                                     | 3      | 3  | 4    | 4    |
| Figure S5F                      | ChIP-QPCR H2AP/H2A                    | Number of experiments for each primer |        |    |      |      |
|                                 | Primer                                | P1                                    | P2     | P3 | P4   |      |
|                                 | Distance from <i>E</i> silencer       | -3,7                                  | -2,2   | -1 | -0,5 |      |
|                                 | yAT1798 wt const No Silencer          | 3                                     | 3      | 3  | 3    |      |
|                                 | yAT1909 wt non-ind No Silencer        | 4                                     | 4      | 4  | 4    |      |
|                                 | wt ind No Silencer 90 min             | 3                                     | 3      | 3  | 3    |      |
|                                 | ChIP-QPCR H2A                         | Number of experiments for each primer |        |    |      |      |
|                                 | Primer                                | P1                                    | P2     | P3 | P4   |      |
|                                 | Distance from <i>E</i> silencer       | -3,7                                  | -2,2   | -1 | -0,5 |      |
|                                 | yAT1798 wt const No Silencer          | 3                                     | 3      | 3  | 3    |      |
| yAT1909 wt non-ind. No Silencer | 4                                     | 4                                     | 4      | 4  |      |      |
|                                 | wt ind No Silencer 90 min             | 3                                     | 3      | 3  | 3    |      |
| Figure S5G                      | ChIP-QPCR Sir3                        | Number of experiments for each primer |        |    |      |      |
|                                 | Distance from End Tel6R               | 0,2 kb                                | 0,5 kb |    |      |      |
|                                 | yAT2078 wt                            | 43                                    | 12     |    |      |      |
|                                 | yAT2965 <i>hta-S129A</i>              | 11                                    | 7      |    |      |      |
|                                 | yAT2314 $\Delta tel1$                 | 9                                     | nd     |    |      |      |
|                                 | yAT2904 $\Delta mec1$                 | 5                                     | nd     |    |      |      |
|                                 | yAT2370 $\Delta sir3$                 | 13                                    | nd     |    |      |      |
|                                 |                                       |                                       |        |    |      |      |
| Figure 6A                       | ChIP-QPCR H2A                         | Number of experiments for each primer |        |    |      |      |
|                                 | Primer                                | P1                                    | P2     | P3 | P4   | P5   |
|                                 | Distance from <i>E</i> silencer in kb | -3,7                                  | -2,2   | -1 | -0,5 | 3,2  |
|                                 | yAT2059 wt const.                     | 7                                     | 7      | 7  | 7    | 6    |
|                                 | yAT2078 wt non-ind.                   | 11                                    | 13     | 12 | 13   | 14   |
|                                 | wt ind. 45 min                        | 5                                     | 6      | 5  | 6    | 6    |
|                                 | wt ind. 90 min                        | 8                                     | 10     | 9  | 9    | 10   |
|                                 | wt ind. 180 min                       | 7                                     | 7      | 8  | 8    | 8    |
|                                 | wt ind. 1200 min                      | 6                                     | 8      | 7  | 9    | 9    |
| Figure 6B                       | ChIP-QPCR H2A                         | Number of experiments for each primer |        |    |      |      |
|                                 | time in min after induction           | 0                                     | 45     | 90 | 180  | 1200 |
|                                 | yAT2078 wt ind at P2                  | 13                                    | 6      | 10 | 7    | 8    |
|                                 | wt ind at P4                          | 13                                    | 6      | 9  | 8    | 9    |
|                                 | yAT2370 $\Delta sir3$ ind at P2       | 7                                     | 3      | 3  | 5    | 4    |
|                                 | $\Delta sir3$ ind at P4               | 7                                     | 3      | 3  | 5    | 4    |

| Figure 6C | ChIP-QPCR H2A<br>Primer | Number of experiments for each primer |    |
|-----------|-------------------------|---------------------------------------|----|
|           |                         | P1                                    | P2 |
| yAT2000   | wt const.               | 6                                     | 6  |
| yAT2001   | wt No LacI              | 6                                     | 6  |
| yAT2156   | $\Delta sir3$ const.    | 4                                     | 4  |

| Figure 6D | ChIP-QPCR H2A<br>Distance from End Tel6R | Number of experiments for each primer |        |      |
|-----------|------------------------------------------|---------------------------------------|--------|------|
|           |                                          | 0,2 kb                                | 0,5 kb | 1 kb |
| yAT2078   | wt                                       | 26                                    | 5      | 5    |
| yAT2370   | $\Delta sir3$                            | 11                                    | 4      | 4    |

| Figure S6A  | ChIP-QPCR H2A<br>Primer | Number of experiments for each primer |    |
|-------------|-------------------------|---------------------------------------|----|
|             |                         | P2                                    | P4 |
| yAT2059 H2A | wt const.               | 7                                     | 7  |
| yAT2001 H2A | wt No LacI              | 6                                     | 6  |
| yAT3420 H2A | wt const. No Silencer   | 3                                     | 3  |

**Table S4: Statistics**

Kruskal Wallis ANOVA test,  $p$ -values are corrected using Tukey's range test

$p > 0.01$  is non-significant (ns) and shown in red.

**Fig. 2B Comparison of the intensity of the *lacO E-ADE2-I/GFP-LacIR* spot in G1 between different conditions**

| (N; n)<br>conditions | (11; 1436)<br>wt const | (3; 604)<br>wt ind.<br>30min | (4; 417)<br>wt ind.<br>45 min | (3; 377)<br>wt ind.<br>90min | (5; 725)<br>wt ind.<br>180 min | (14; 2156)<br>wt ind.<br>1200 min |
|----------------------|------------------------|------------------------------|-------------------------------|------------------------------|--------------------------------|-----------------------------------|
| wt const             |                        | 2.068e-08                    | 9.002e-01                     | 2.068e-08                    | 2.068e-08                      | 2.068e-08                         |
| wt ind. 30 min       |                        |                              | 2.068e-08                     |                              |                                |                                   |
| wt ind. 45 min       |                        |                              |                               | 2.068e-08                    |                                |                                   |
| wt ind. 90 min       |                        |                              |                               |                              | 2.068e-08                      |                                   |
| wt ind. 180 min      |                        |                              |                               |                              |                                | 1.000e+00                         |

**Fig. 2C Comparison of the localization of the *lacO E-ADE2-I/GFP-LacIR* spot in G1 in between different conditions**

| (N; n)<br>conditions   | (11; 1526)<br>wt const | (3; 600)<br>wt ind.<br>30 min | (4; 417)<br>wt ind.<br>45 min | (3; 377)<br>wt ind.<br>90 min | (5; 725)<br>wt ind.<br>180 min | (14; 2213)<br>wt ind.<br>1200 min |
|------------------------|------------------------|-------------------------------|-------------------------------|-------------------------------|--------------------------------|-----------------------------------|
| wt const               |                        | 3.706e-08                     | 3.706e-08                     | 1.419e-02                     | 1.075e-04                      | 3.205e-03                         |
| wt ind. 30 min         |                        |                               | 1.000e+00                     | 8.463e-07                     |                                |                                   |
| wt ind. 45 min         |                        |                               |                               | 4.231e-06                     |                                |                                   |
| wt ind. 90 min         |                        |                               |                               |                               | 1.000e+00                      | 2.771e-07                         |
| wt ind. 180 min        |                        |                               |                               |                               |                                | 3.706e-08                         |
| wt cont.<br>NoSilencer |                        | 5.111e-01                     | 5.787e-01                     | 1.891e-05                     | 6.248e-08                      | 3.706e-08                         |

**Fig. S2A Comparison of the intensity of the *lacO E-ADE2-I/GFP-LacIR* spot in S-G2 between different conditions**

| (N; n)<br>conditions | (11; 1178)<br>wt const | (3; 537)<br>wt ind.<br>30 min | (4; 350)<br>wt ind.<br>45 min | (3; 237)<br>wt ind.<br>90 min | (5; 378)<br>wt ind.<br>180 min | (14; 1566)<br>wt ind.<br>1200 min |
|----------------------|------------------------|-------------------------------|-------------------------------|-------------------------------|--------------------------------|-----------------------------------|
| wt const             |                        | 2.068e-08                     | 9.987e-01                     | 2.068e-08                     | 2.068e-08                      | 2.068e-08                         |
| wt ind. 30 min       |                        |                               | 2.068e-08                     |                               |                                |                                   |
| wt ind. 45 min       |                        |                               |                               | 2.068e-08                     |                                |                                   |
| wt ind. 90 min       |                        |                               |                               |                               | 6.213e-08                      |                                   |
| wt ind. 180 min      |                        |                               |                               |                               |                                | 5.973e-01                         |

**Comparison of the intensity of the *lacO E-ADE2-I/GFP-LacIR* spot in between G1 and S-G2 in each condition**

|                  |           |
|------------------|-----------|
| wt const         | 1.074e-10 |
| wt ind. 30 min   | 3.812e-01 |
| wt ind. 45 min   | 3.696e-02 |
| wt ind. 90 min   | 3.031e-06 |
| wt ind. 180 min  | 1.060e-10 |
| wt ind. 1200 min | 1.060e-10 |



**Fig. S2C Comparison of the localization of the *lacO E-ADE2-I*/GFP-LacIR spot in S-G2 in between different conditions**

| (N; n)               | (11; 1250) | (3; 540)          | (4; 350)          | (3; 237)          | (5; 378)           | (14; 1609)          |
|----------------------|------------|-------------------|-------------------|-------------------|--------------------|---------------------|
| conditions           | wt const   | wt ind.<br>30 min | wt ind.<br>45 min | wt ind.<br>90 min | wt ind.<br>180 min | wt ind.<br>1200 min |
| wt const             |            | 3.706e-08         | 3.706e-08         | 9.415e-01         | 2.502e-01          | 3.437e-07           |
| wt ind. 30 min       |            |                   | 1.000e+00         | 3.254e-06         |                    |                     |
| wt ind. 45 min       |            |                   |                   | 3.221e-05         |                    |                     |
| wt ind. 90 min       |            |                   |                   |                   | 9.914e-01          | 6.853e-04           |
| wt ind. 180 min      |            |                   |                   |                   |                    | 6.075e-08           |
| wt cont. No Silencer |            | 8.413e-01         | 9.447e-01         | 2.162e-05         | 2.073e-05          | 3.706e-08           |

**Fig. S2D Comparison of the localization of the *lacO E-ADE2-I*/GFP-LacIR spot in between G1 and S-G2 in each condition**

|                  |           |
|------------------|-----------|
| wt const         | 5.687e-08 |
| wt ind. 30 min   | 1.122e-03 |
| wt ind. 45 min   | 8.202e-03 |
| wt ind. 90 min   | 2.578e-01 |
| wt ind. 180 min  | 1.694e-02 |
| wt ind. 1200 min | 8.290e-03 |

**Fig. 4A Comparison of the localization of the *lacO E-ADE2-I*/GFP-LacIR spot in G1 in between different conditions**

| (N; n)                      | (7; 1017)            | (5; 725)       | (14; 2213)      | (3; 511)                       | (3; 531)                 | (8; 1502)                 |
|-----------------------------|----------------------|----------------|-----------------|--------------------------------|--------------------------|---------------------------|
| conditions                  | wt ind.<br>30_45 min | wt ind.<br>3 h | wt ind.<br>20 h | <i>sir3Δ</i> ind.<br>30_45 min | <i>sir3Δ</i> ind.<br>3 h | <i>sir3Δ</i> ind.<br>20 h |
| wt ind. 30_45 min           |                      |                |                 | 9.648e-01                      | 1.544e-06                | 2.069e-08                 |
| wt ind. 3 h                 |                      |                |                 |                                | 9.079e-01                | 9.032e-01                 |
| wt ind. 20 h                |                      |                |                 |                                | 2.069e-08                | 2.068e-08                 |
| <i>sir3Δ</i> ind. 30_45 min |                      |                |                 |                                | 2.106e-03                | 2.109e-08                 |
| <i>sir3Δ</i> ind. 3 h       |                      |                |                 |                                |                          | 2.858e-01                 |

**Fig. 4B Comparison of the localization of the *lacO E-ADE2-I*/GFP-LacIR spot in G1 in between different conditions**

| (N; n)                 | (14; 2213)  | (8; 1502)              | (12; 2052)               | (9; 1546)                  |
|------------------------|-------------|------------------------|--------------------------|----------------------------|
| conditions             | wt ind.20 h | <i>sir3Δ</i> ind. 20 h | wt const.<br>No silencer | wt ind.20 h<br>No silencer |
| wt ind. 20 h           |             |                        | 3.768e-09                | 3.768e-09                  |
| <i>sir3Δ</i> ind. 20 h |             |                        | 3.768e-09                | 7.172e-01                  |
| wt const. No silencer  |             |                        |                          | 3.769e-09                  |

**Fig. 4D Comparison of the intensity of the *lacO E-ADE2-I*/GFP-LacIR spot in G1 between different conditions**

| (N; n)                | (12; 1933)            | (9; 1331)                |
|-----------------------|-----------------------|--------------------------|
| conditions            | wt const. No silencer | wt ind. 20 h No silencer |
| wt const. No silencer |                       | 1.060e-10                |

**Fig. S4A Comparison of the localization of the *lacO E-ADE2-I*/GFP-LacIR spot in G1 in between different conditions**

| (N; n)                 | (14; 2213)   | (8;1502)               | (5; 991)               |
|------------------------|--------------|------------------------|------------------------|
| conditions             | wt ind. 20 h | <i>sir3Δ</i> ind. 20 h | <i>sir4Δ</i> ind. 20 h |
| wt ind. 20 h           |              | 9.561e-10              | 9.564e-10              |
| <i>sir3Δ</i> ind. 20 h |              |                        | 9.997e-01              |

**Fig. S4B Comparison of the localization of the *lacO E-ADE2-I*/GFP-LacIR spot in S-G2 in between different conditions**

| (N; n)                      | (7; 890)          | (5; 378)    | (14; 1609)   | (3; 463)                    | (3; 250)              | (8; 965)               |
|-----------------------------|-------------------|-------------|--------------|-----------------------------|-----------------------|------------------------|
| conditions                  | wt ind. 30_45 min | wt ind. 3 h | wt ind. 20 h | <i>sir3Δ</i> ind. 30_45 min | <i>sir3Δ</i> ind. 3 h | <i>sir3Δ</i> ind. 20 h |
| wt ind. 30_45 min           |                   |             |              | 6.153e-01                   | 3.013e-04             | 2.068e-08              |
| wt ind. 3 h                 |                   |             |              | 1.095e-02                   | 9.999e-01             | 1.458e-02              |
| wt ind. 20 h                |                   |             |              |                             | 2.238e-07             | 5.064e-04              |
| <i>sir3Δ</i> ind. 30_45 min |                   |             |              |                             | 7.721e-02             | 2.068e-08              |
| <i>sir3Δ</i> ind. 3 h       |                   |             |              |                             |                       | 2.646e-02              |

**Fig. 5F Comparison of the localization of the *lacO E-ADE2-I*/GFP-LacIR spot in G1 in between different conditions**

| (N; n)                | (5; 725)   | (14; 2213)  | (3;435)               | (4; 708)                  |
|-----------------------|------------|-------------|-----------------------|---------------------------|
| conditions            | wt ind. 3h | wt ind. 20h | <i>mec1Δ</i> ind. 20h | <i>hta-S129A</i> ind. 20h |
| wt ind. 3h            |            | 3.768e-09   | 3.769e-09             | 9.606e-09                 |
| wt ind. 20h           |            |             | 3.468e-01             | 7.674e-01                 |
| <i>mec1Δ</i> ind. 20h |            |             |                       | 1.489e-01                 |

**Fig. S5H Comparison of the localization of the *lacO E-ADE2-I*/GFP-LacIR spot in G1 in between different conditions**

| (N; n)                          | (8; 1502)              | (6; 1017)                        | (12; 2052)            | (9; 1546)                |
|---------------------------------|------------------------|----------------------------------|-----------------------|--------------------------|
| conditions                      | <i>sir3Δ</i> ind. 20 h | <i>hta-S129A/Sir3Δ</i> ind. 20 h | wt const. No silencer | wt ind. 20 h No silencer |
| <i>sir3Δ</i> ind. 20 h          |                        | 2.459e-01                        | 3.768e-09             | 7.032e-01                |
| <i>htaS129A/Sir3Δ</i> ind. 20 h |                        |                                  | 2.796e-07             | 8.034e-01                |
| wt const. No silencer           |                        |                                  |                       | 3.770e-09                |

**Fig. 6F Comparison of the intensity of the *lacO E-ADE2-I*/GFP-LacIR spot in G1 between different conditions**

| (N; n)    | (4; 541)  | (4; 613)            |
|-----------|-----------|---------------------|
| condition | wt const. | <i>sir3Δ</i> const. |
| wt const. |           | 1.060e-10           |

**Fig. S6B Comparison of the intensity of the *lacO E-ADE2-I*/GFP-LacIR spot in G1 between different conditions**

|           |           |                       |
|-----------|-----------|-----------------------|
| (N; n)    | (3; 942)  | (3; 836)              |
| condition | wt const. | wt const. No Silencer |
| wt const. |           | 1.060e-10             |

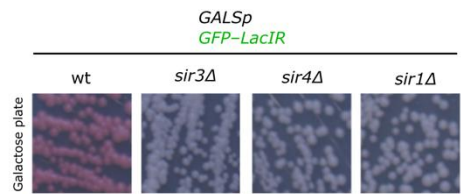

Loïodice et al. Figure S1

**Figure S1** related to Figure 1. LacI induced silencing requires Sir3, Sir4 and Sir1. Pictures of yeast colonies bearing the *lys2::lacO E-ADE2-I* locus and expressing the *GALSp*-GFP-LacIR in the WT (yAT2078), in the *sir3Δ* (yAT2370), in the *sir4Δ* (yAT3259), or in the *sir1Δ* (yAT3258) strains streaked on galactose plate.

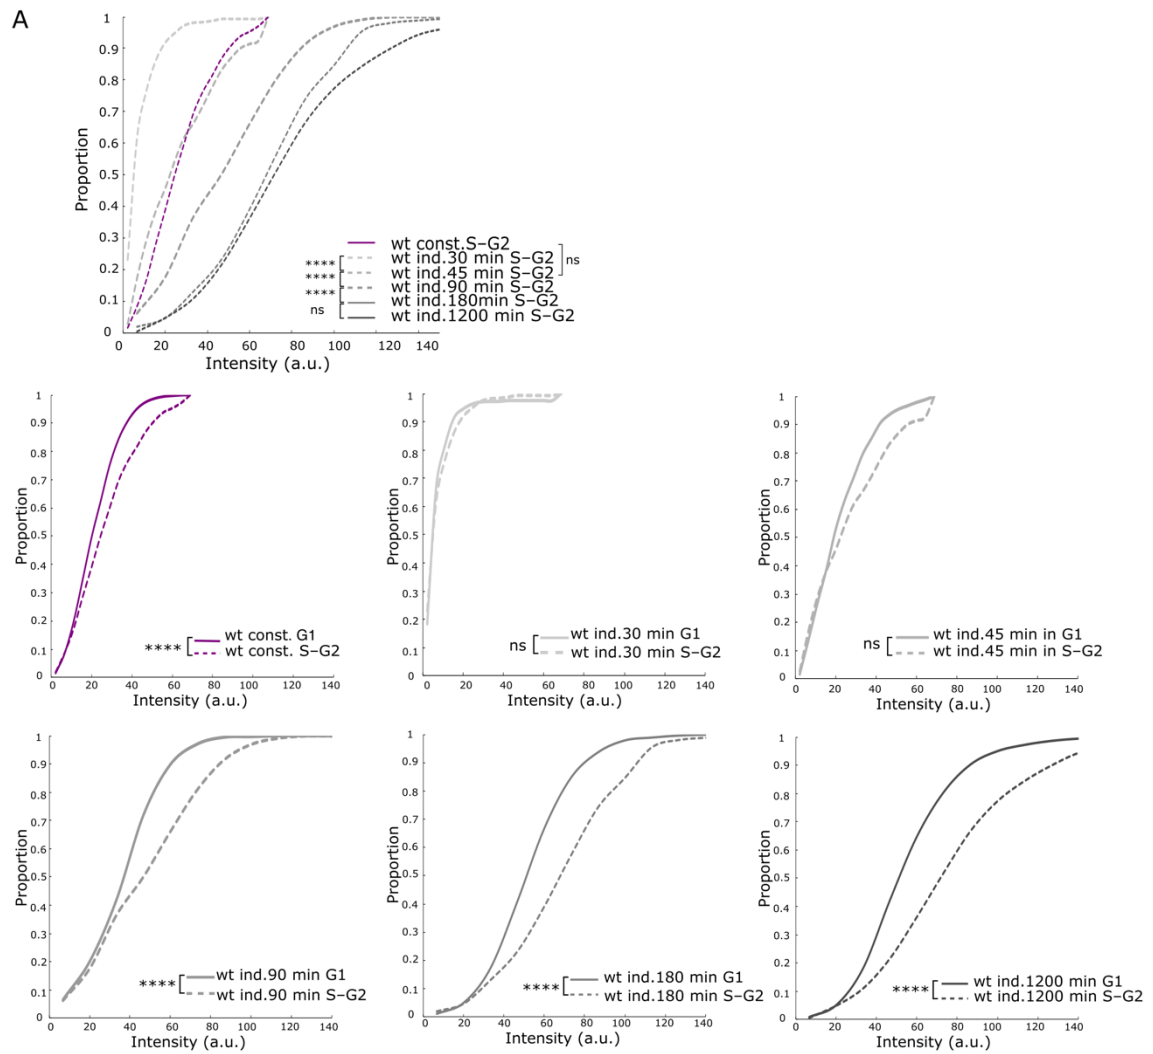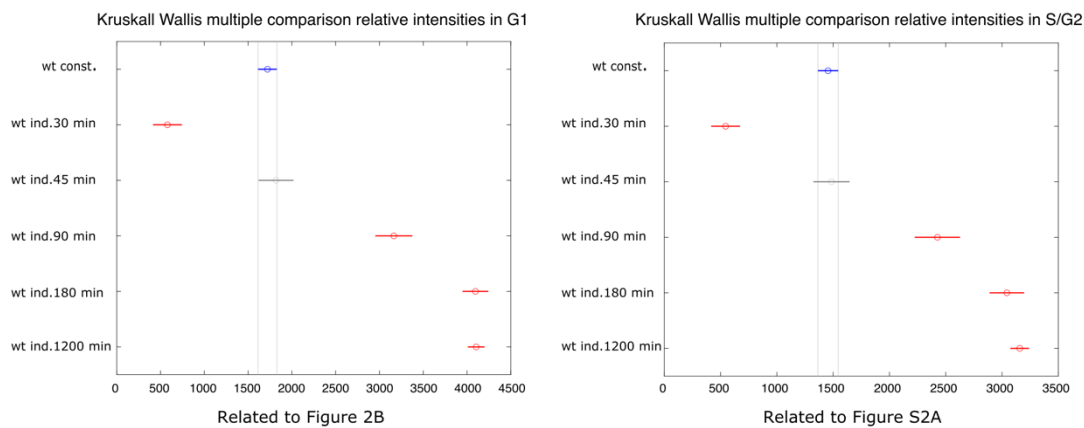

Groups with overlapping confidence intervals on the X axis are not significantly different at a significance level of 0.01

Loiodice et al. Figure S2 1/3

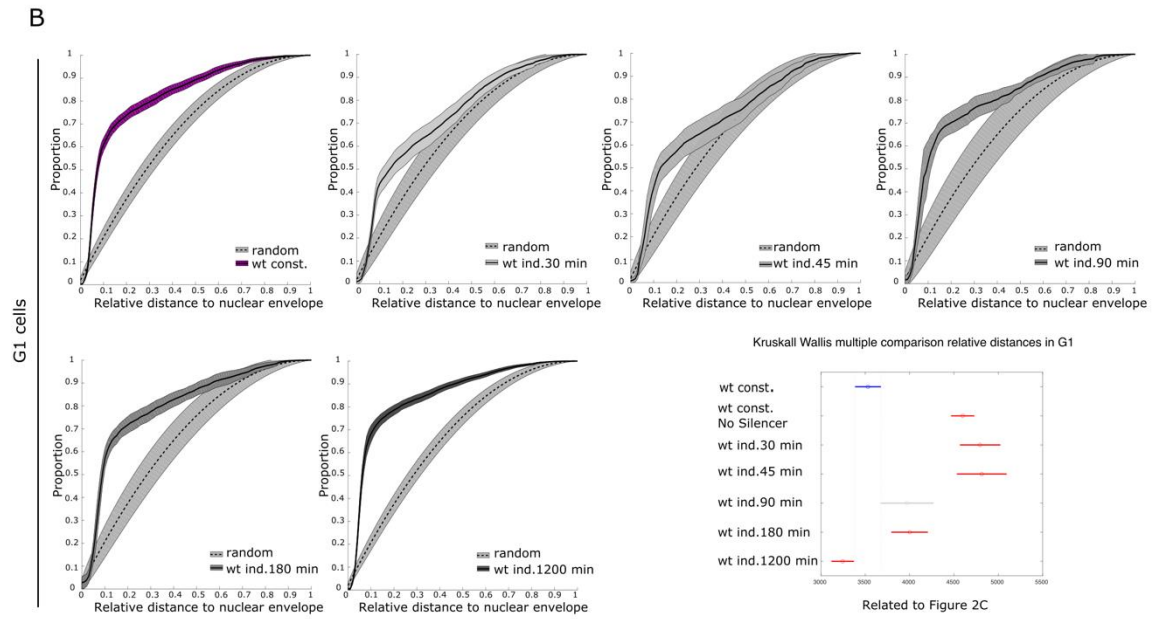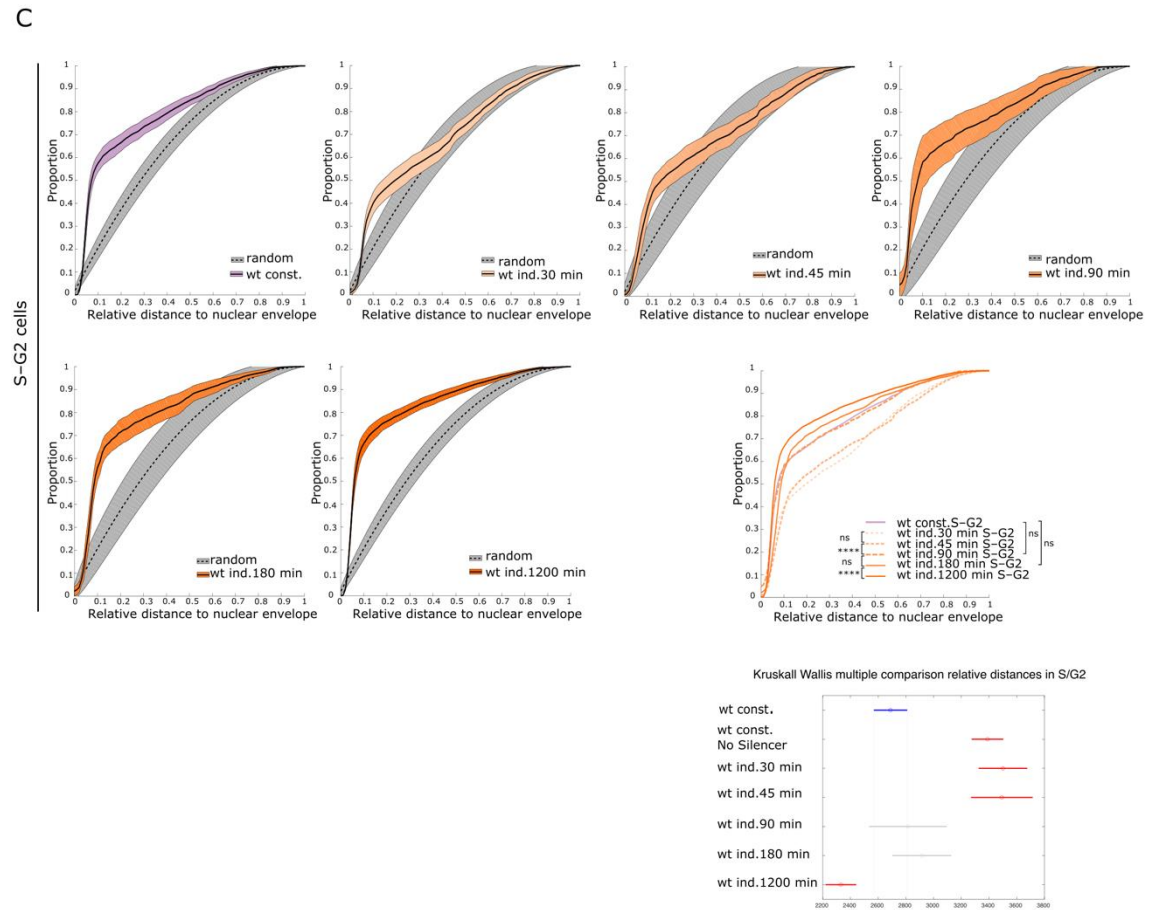

Loiodice et al. Figure S2 2/3

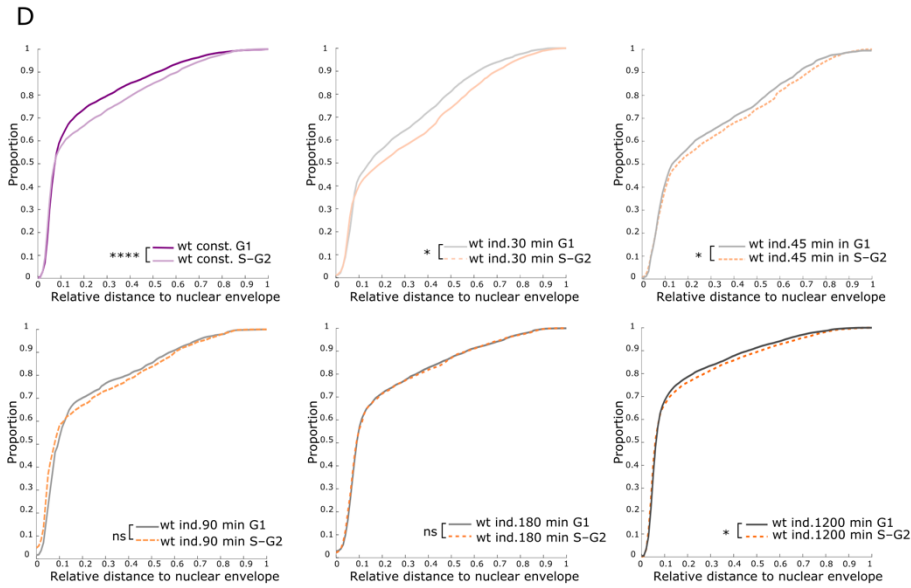

Loiodice et al. Figure S3/3

**Figure S2** related to Figure 2. Distribution of intensities and localization of the *lys2::lacO E-ADE2-I* locus in G1 and S/G2 cells upon LacI induction. **(A)** Cumulative distributions of the intensity of GFP foci in S-G2 cells in strains bearing the *lys2::lacO E-ADE2-I* locus and expressing GFP-LacIR either under the constitutive *HIS3* promoter (wt const. yAT2059) or under the inducible *GALS* promoter (wt ind. yAT2078) at 30 min, 45 min, 90 min, 180 min, and 1200 min after galactose induction of the GFP-LacIR protein (upper panel). Cumulative distributions of the intensity of GFP foci in G1 and S-G2 for each time-point after galactose induction. And graphs of the estimates and comparison intervals obtained from Kruskal Wallis tests on the intensities of lacO/LacIR-GFP foci in G1 and in S-G2 cells for each condition (lower panels).  $p > 0,01$  is non significant (ns),  $p \leq 0,01$  (\*),  $p \leq 0,00001$ (\*\*\*\*) and see Table S4 for statistics. **(B)** Cumulative distributions of the relative distance of *lys2::lacO E-ADE2-I* locus to the nuclear periphery in G1 cells, in strains expressing GFP-LacIR either under the constitutive *HIS3* promoter (wt const. yAT2059) grown in galactose medium or under the inducible *GALS* promoter (wt ind. yAT2078) at 30 min, 45 min, 90 min, 180 min, and 1200 min after galactose induction of the GFP-LacIR protein compared to a simulated random distribution for each condition. And graphs of the estimates and comparison intervals obtained from Kruskal Wallis tests on the relative distance of lacO/LacIR-GFP foci to the nuclear periphery in G1 cells for each condition. **(C)** Cumulative distributions of the relative distance of *lys2::lacO E-ADE2-I* locus to the nuclear periphery in S-G2 cells in strains expressing GFP-LacIR either under the constitutive *HIS3* promoter (wt const. yAT2059) grown in galactose medium or under the inducible *GALS* promoter (wt ind. yAT2078) at 30 min, 45 min, 90 min, 180 min, and 1200 min after galactose induction of the GFP-LacIR protein compared to a simulated random distribution for each condition. Cumulative distributions of the relative distance of *lys2::lacO E-ADE2-I* locus to the nuclear periphery in S-G2 cells. And graphs of the estimates and comparison intervals obtained from Kruskal Wallis tests on the relative distance of lacO/LacIR-GFP foci to the nuclear periphery in S-G2 cells for each condition  $p > 0,01$  is non significant (ns),  $p \leq 0,01$  (\*),  $p \leq 0,00001$ (\*\*\*\*) and see Table S4 for statistics. **(D)** Cumulative distributions of the relative distance of *lys2::lacO E-ADE2-I* locus to the nuclear periphery, in G1 or S-G2 cells, in strains expressing GFP-LacIR either under the constitutive *HIS3* promoter (wt const. yAT2059) grown in galactose medium or under the inducible *GALS* promoter (wt ind. yAT2078) at 30 min, 45 min, 90 min, 180 min, and 1200 min after galactose induction of the GFP-LacIR protein for each condition.  $p > 0,01$  is non significant (ns),  $p \leq 0,01$  (\*),  $p \leq 0,00001$ (\*\*\*\*) and see Table S4 for statistics.

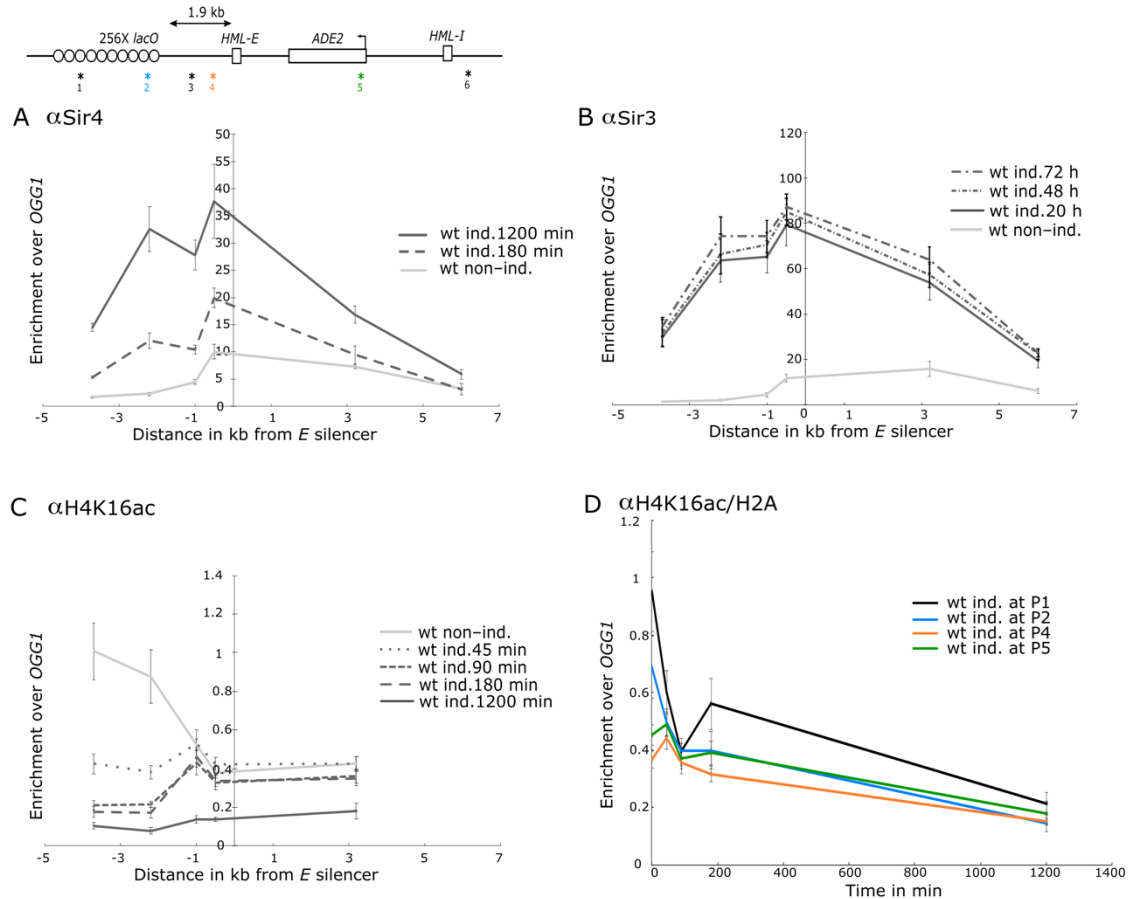

Loiodice et al. Figure S3

**Figure S3** related to Figure 3. Heterochromatin formation takes place over several cell cycles and Sir3 recruitment plateaus after 24h. **(A)** Sir4 occupancy along the *lys2::lacO E-ADE2-I* locus, probed by ChIP-qPCR using an anti-Sir4 antibody developed by us (in this paper), in a strain expressing GFP-LacIR under the inducible *GALS* promoter (wt ind., yAT2078) in raffinose (no induction), or after 180 min, and 1200 min of galactose induction of the GFP-LacIR protein. (P1), (P2), (P3) (P4) amplicons are respectively located at 3.7 kb, 2.2 kb, 1 kb, and 0.5 kb from the left side of the *E* silencer, and (P5) and (P6) amplicons are located at 3.2 kb and 6 kb from the right side of the *E* silencer, amplicon positions are localized with an asterisk and their respective number on the scheme of the locus. The data were normalized over *OGG1* (shown as mean  $\pm$  s.e.m. ; see Table S3 for the number of experiments). **(B)** Sir3 occupancy along the of *lys2::lacO E-ADE2-I* locus, probed by ChIP-qPCR using an anti-Sir3 antibody developed by us (Ruault et al., 2011), in strains expressing GFP-LacIR under the inducible *GALS* promoter (wt ind. yAT2078) in raffinose (no induction), or after 20 h, 48 h and 72 h of galactose induction of the GFP-LacIR protein. The data were normalized over *OGG1* (shown as mean  $\pm$  s.e.m.; see Table S3 for the number of experiments). **(C)** H4K16 acetylation occupancy along the of *lys2::lacO E-ADE2-I* locus, probed by ChIP-qPCR using an anti-acetyl-histone H4 (Lys16) antibody in a strain expressing GFP-LacIR under the inducible *GALS* promoter (wt ind., yAT2078) in raffinose (no induction), or after 45 min, 90 min, 180 min, and 1200 min of galactose induction of the GFP-LacIR protein. The data were normalized over *OGG1* (shown as mean  $\pm$  s.e.m. ; see Table S3 for the number of experiments). **(D)** H4K16 acetylation enrichment over time at the (P1), (P2), (P4) and (P5) sites obtained by plotting data from Figure S3B when normalized by H2A ChIP signal. Error bars represent s.e.m (see Table S3 for the number of experiments).



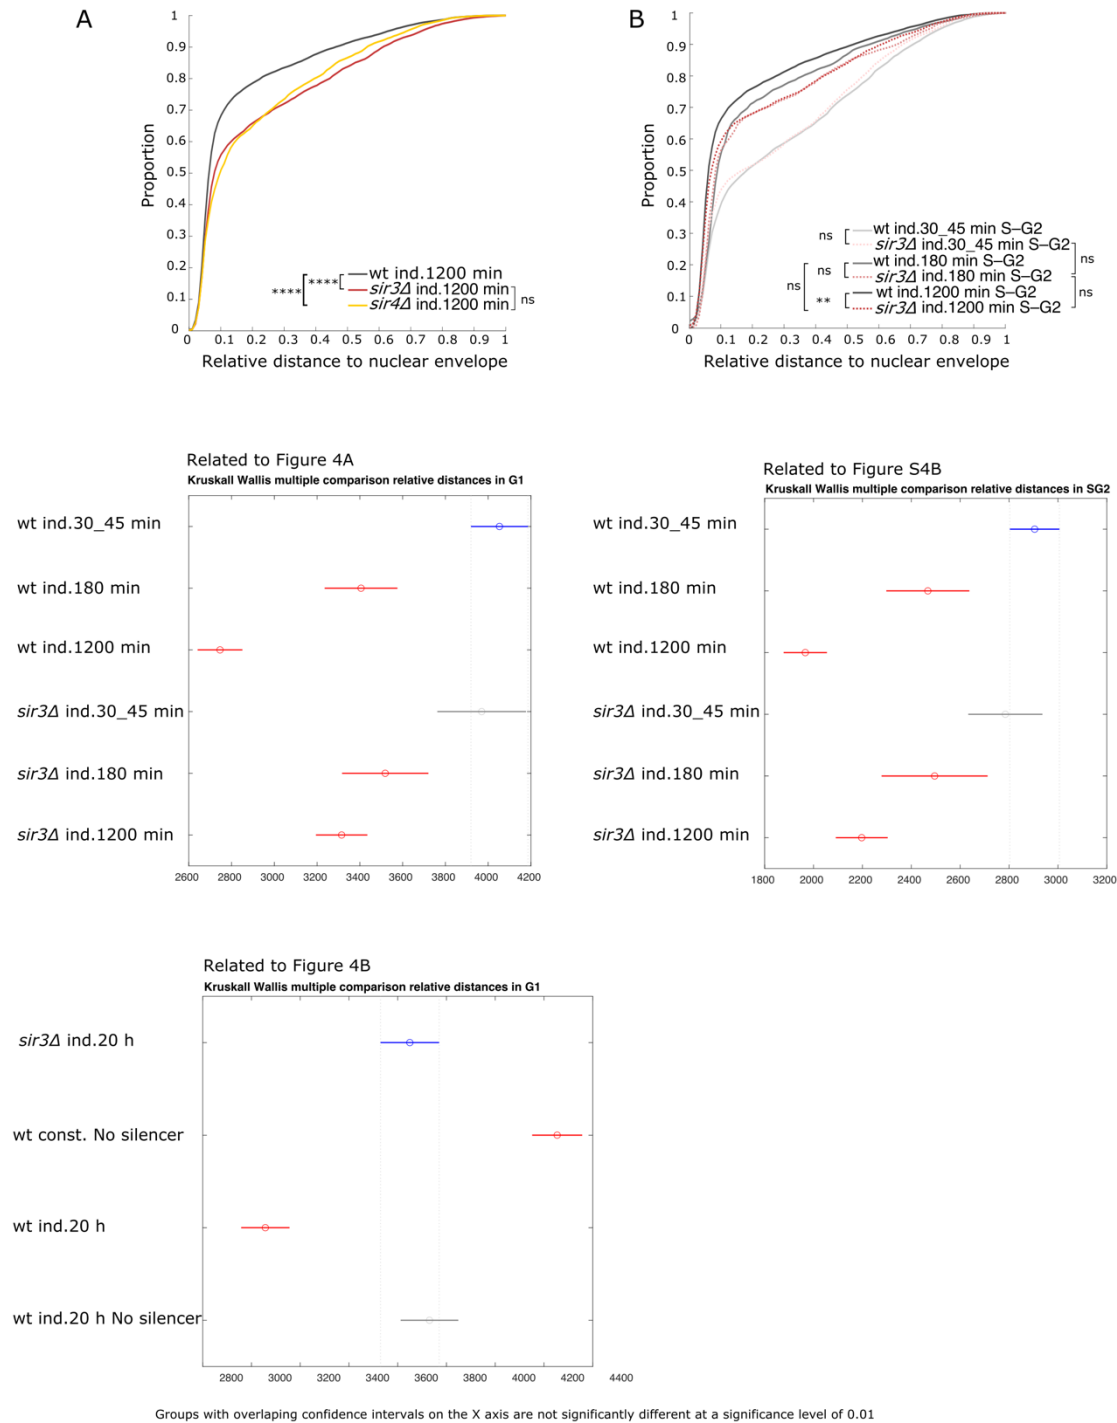

Loiodice et al. Figure S4

**Figure S4 related to Figure 4.** Perinuclear anchoring is partly Sir3 and Sir4 independent in G1 and S/G2 cells. **(A)** Cumulative distributions of the relative distance of *lys2::lacO E-ADE2-I* locus to the nuclear periphery in G1 cells, in strains expressing GFP-LacIR under the inducible *GALS* promoter in the WT (wt ind., yAT2078), in a *sir3Δ* (*sir3Δ ind.*, yAT2370) and in a *sir4Δ* (*sir4Δ ind.*, yAT2370) after 1200 min of galactose induction.  $p > 0,01$  is non significant (ns),  $p \leq 0,00001$  (\*\*\*\*) and see Table S4 for statistics. **(B)**



Cumulative distributions of the relative distance of *lys2:: lacO E-ADE2-I* locus to the nuclear periphery in S-G2 cells, in strains expressing GFP-LacIR under the inducible *GALS* promoter in the WT (wt ind., yAT2078) and in a *sir3Δ* (*sir3Δ ind.*, yAT2370) after 30\_45 min, 180 min, and 1200 min of galactose induction.  $p > 0,01$  is non significant (ns),  $p \leq 0,001$  (\*\*), and see Table S4 for statistics. And graphs of the estimates and comparison intervals obtained from Kruskal Wallis tests on the relative distance of lacO/LacI-GFP spots to the nuclear periphery in G1 and in S-G2 cells for each condition (lower panels).

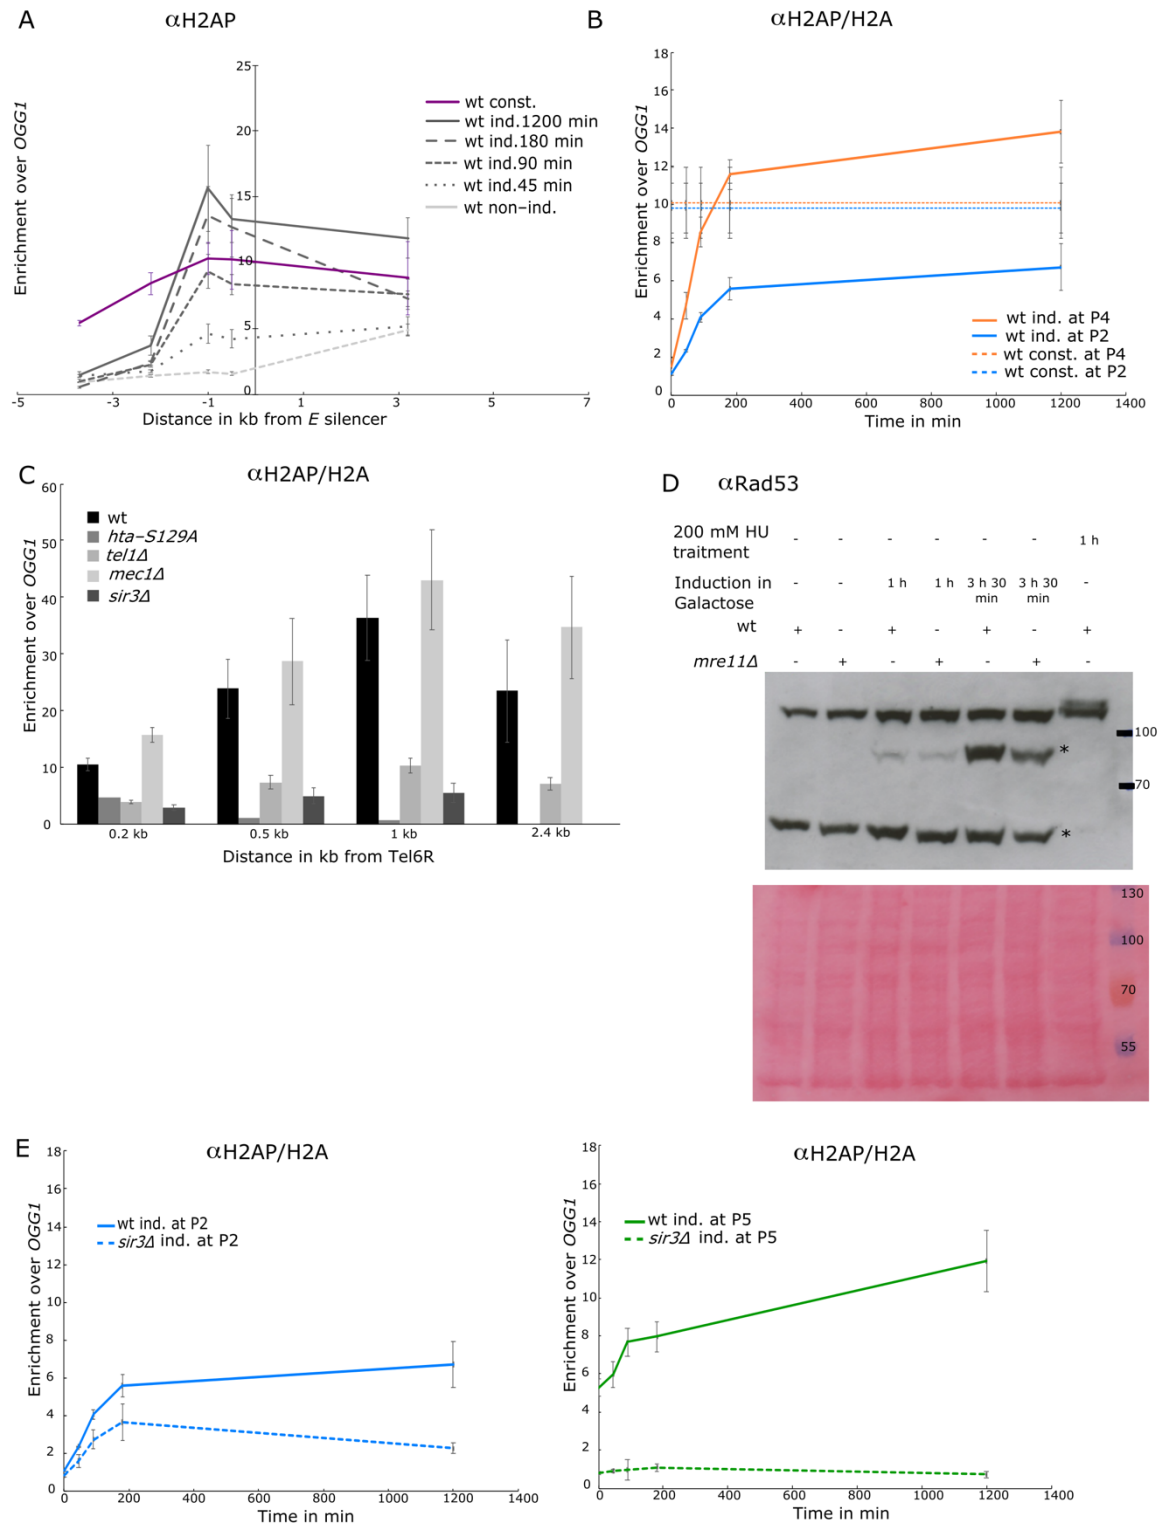

Loïdiche et al. Figure S5 1/2

F

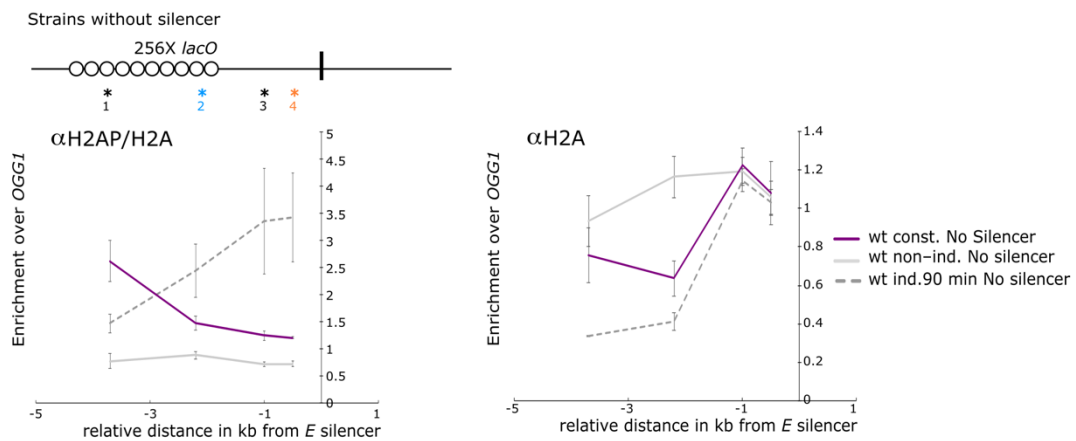

G

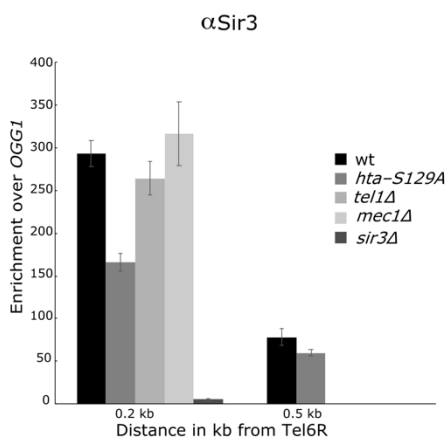

H

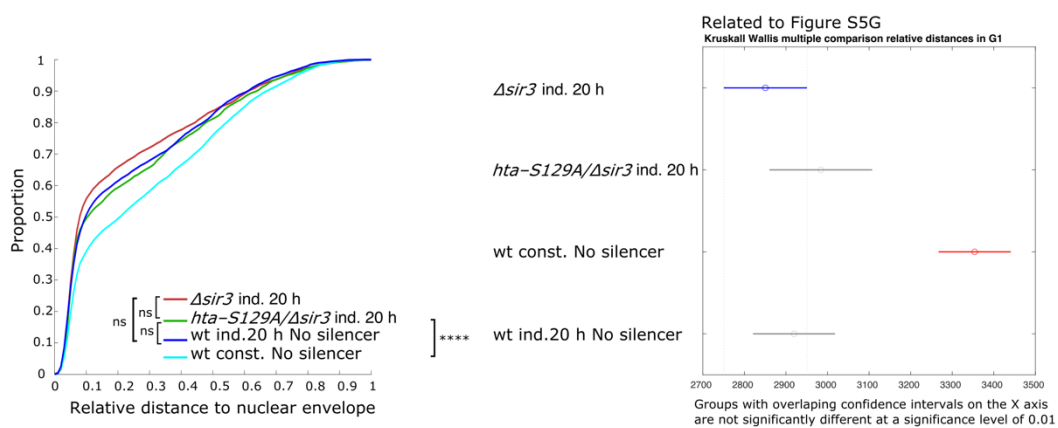

Loiodice et al. Figure S5 2/2

**Figure S5** related to Figure 5. LacI binding induces a transient H2A phosphorylation without detectable Rad53 phosphorylation. (A) H2A-S129 phosphorylation occupancy along the *lys2::lacO E-ADE2-I* locus probed by ChIP-qPCR using an anti-H2A Phospho-S129 antibody in strains expressing either the GFP-LacIR under the constitutive *HIS3* promoter (wt const., yAT2059) or under the *GALS* promoter (wt ind.,

yAT2078) in raffinose (no induction), or after 45 min, 90 min, 180 min, and 1200 min of galactose induction. The data were normalized over *OGG1* (shown as mean  $\pm$  s.e.m. ; see Table S3 for the number of experiments). (B) H2A-S129 phosphorylation enrichment over time at (P2) and (P4) obtained by plotting the data from Figure 5A. (C) H2A-S129 phosphorylation occupancy at 0,2 kb, 0,5 kb, 1 kb and 2,4 kb from the end of telomere 6R, in strains bearing the *lys2::lacO E-ADE2-I* locus, probed by ChIP-qPCR using an anti-H2A Phospho-S129 antibody and expressing GFP-LacIR under the inducible *GALS* promoter in the WT (wt ind., yAT2078), in a *hta-S129A* mutant (*hta-S129A* ind, yAT2965) as a control for the background of the ChIP experiment, in a *tel1Δ* (*tel1Δ ind.,* yAT2314), in a *mec1Δ* (*mec1Δ ind.,* yAT2904), and in a *sir3Δ* (*sir3Δ ind.,* yAT2370) strains. The data were normalized over *OGG1* and histone H2A ChIP signal (shown as mean  $\pm$  s.e.m. ; see Table S3 for the number of experiments). (D) Immunoblots with anti-Rad53 antibody (Rad53 (yC-19):sc-6749, Santa Cruz) on crude extracts from strains expressing GFP-LacIR under the inducible *GALS* promoter in a WT (wt ind. No Silencer, yAT1909) and *mre11Δ* (*mre11Δ ind. No Silencer, yAT2142*) strains, in raffinose (no induction) or after 1 h and 3 h 30 min of galactose induction. As a positive control of full activation of Rad53, WT strain (yAT1798) expressing GFP-LacI under *HIS3* promoter was treated with 200 mM HU (hydroxyurea, Sigma-Aldrich). \* Interpreted as unspecific bands related to growth media. (E) H2A-S129 phosphorylation enrichment over time at the *lacO* (P2) (left panel) and in the body of *ADE2* gene (P5) (right panel) in strains bearing the *lys2::lacO E-ADE2-I* locus, probed by ChIP-qPCR using an anti-H2A Phospho-S129 antibody in strains expressing GFP-LacIR under the *GALS* promoter in the WT (wt ind., yAT2078), and in a *sir3Δ* (*sir3Δ ind.,* yAT2370) strains in raffinose (no induction), or after 45 min, 90 min, 180 min, and 1200 min of galactose induction. The data were normalized over *OGG1* and histone H2A ChIP signal (shown as mean  $\pm$  s.e.m.; see Table S3 for the number of experiments). (F) H2A-S129 phosphorylation (upper panel) and H2A (lower panel) occupancy along the *lys2::lacO array* locus (No Silencer) probed by ChIP-qPCR using anti-H2A Phospho-S129 and anti-H2A antibodies in strains expressing either GFP-LacIR under the constitutive *HIS3* promoter (wt const. No silencer, yAT1798) or under the control of the inducible *GALS* promoter (wt ind. No Silencer, yAT1909) in raffinose (no induction), or after 90 min of galactose induction. The data were normalized over *OGG1* and H2A-S129 phosphorylation was also normalized over histone H2A ChIP signal (shown as mean  $\pm$  s.e.m.; see Table S3 for the number of experiments). (P1), (P2), (P3) and (P4) amplicons are respectively located at 3.7 kb, 2.2 kb, 1 kb and 0.5 kb from the left side of the theoretical location of the E silencer. (G) Sir3 occupancy at 0,2 kb, and 0,5 kb from the end of telomere 6R in strains bearing the *lys2::lacO E-ADE2-I* locus, probed by ChIP-qPCR using anti-Sir3 antibody, and expressing GFP-LacIR under the control of the *GALS* promoter in the WT (wt ind., yAT2078), in a *hta-S129A* (*hta-S129A ind, yAT2965*), and Sir3 occupancy at 0,2 kb from the end of telomere 6R in a *tel1Δ* (*tel1Δ ind.,* yAT2314), in a *mec1Δ* (*mec1Δ ind.,* yAT2904), and in a *sir3Δ* (*sir3Δ ind.,* yAT2370) strains. The data were normalized over *OGG1* (shown as mean  $\pm$  s.e.m. ; see Table S3 for the number of experiments). (H) Left panel: Cumulative distributions of the relative distance of *lys2::lacO E-ADE2-I* locus to the nuclear periphery in G1 cells, in strains expressing GFP-LacIR under the inducible *GALS* promoter in a *sir3Δ* (*Δsir3 ind.,* yAT2370) and in a double mutant *hta-S129A/ sir3Δ* (*hta-S129A/ sir3Δ ind, yAT2995*) strains after 20 h of galactose induction; and cumulative distributions of the relative distance of the *lys2::lacO array* locus (No Silencer) locus to the nuclear periphery in G1 cells, in strains expressing GFP-LacIR either under the inducible *GALS* promoter (wt ind. No Silencer, yAT3471) after 20 h of galactose induction or under the constitutive *HIS3* promoter (wt const. No Silencer, yAT3420).  $p>0,01$  is non significative (ns),  $p\leq 0,00001$  (\*\*\*\*) and see Table S4 for statistics. Right panel: graphs of the estimates and comparison intervals obtained from Kruskal Wallis tests on the relative distance of *lacO/LacI-GFP* spots to the nuclear periphery in G1 cells for each condition (lower panel).

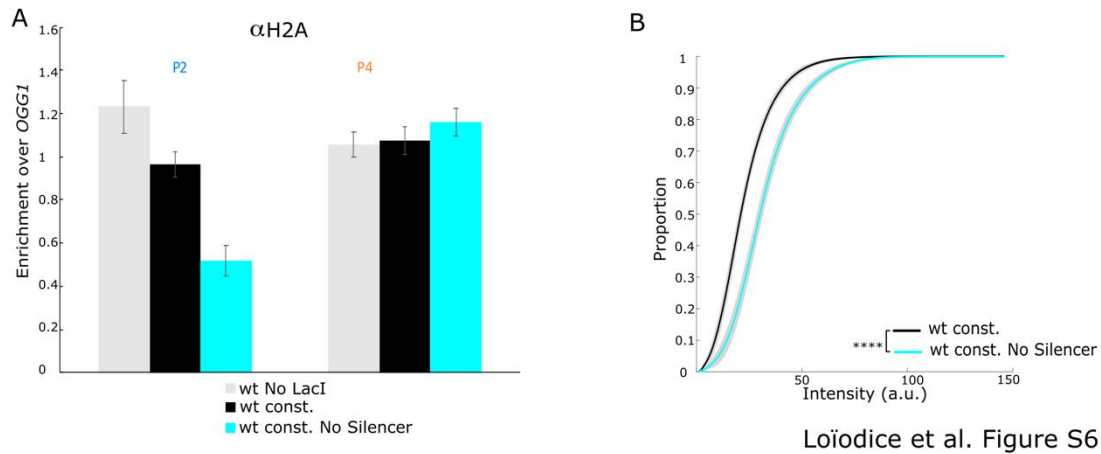

Loïodice et al. Figure S6

**Figure S6** related to Figure 6. SIR spreading stabilizes nucleosome and limits LacI access to DNA. **(A)** H2A occupancy at the *lacO* (P2) and nearby the *E* silencer (P4), probed by ChIP-qPCR using an anti-H2A antibody, in strains bearing the *lys2::lacO E-ADE2-I* locus either without LacI expression (wt No LacI, yAT2001) or expressing GFP-LacIR under the constitutive *HIS3* promoter (wt const., yAT2059) strain; and in a strain bearing the *lys2::lacO* array locus (No silencer) and expressing GFP-LacIR under the constitutive *HIS3* promoter (wt. const No Silencer yAT3420). The data were normalized over *OGG1* (shown as mean  $\pm$  s.e.m. ; see Table S3 for the number of experiments). **(B)** Cumulative distributions of the intensity of GFP foci in G1 cells, expressing GFP-LacIR under the constitutive *HIS3* promoter in strains bearing either the *lys2::lacO E-ADE2-I* locus WT strain (wt const. yAT2059) or the *lys2::lacO* array locus (wt const. No silencer, yAT3420).  $p > 0,01$  is non significant (ns),  $p \leq 0,00001$  (\*\*\*\*) and see Table S4 for statistics.

## References

1. Thomas, B.J.; Rothstein, R. Elevated Recombination Rates in Transcriptionally Active DNA. *Cell* **1989**, *56*, 619–630, doi:10.1016/0092-8674(89)90584-9.
2. Ruault, M.; De Meyer, A.; Loïodice, I.; Taddei, A. Clustering heterochromatin: Sir3 promotes telomere clustering independently of silencing in yeast. *J Cell Biol.* **2011** *192*, 417-431. doi: 10.1083/jcb.201008007.
3. Masumoto, H.; Hawke, D.; Kobayashi, R.; Verreault, A. A role for cell-cycle-regulated histone H3 lysine 56 acetylation in the DNA damage response. *Nature*. **2005**, *436*, 294-2988. doi: 10.1038/nature03714.
4. Winston, F.; Dollard, C.; Ricupero-Hovasse, S.L. Construction of a Set of Convenient *Saccharomyces cerevisiae* Strains That Are Isogenic to S288C. *Yeast* **1995**, *11*, 53–55, doi:10.1002/yea.320110107.
